# Supplementary material
Source: PubMed Central journal article supplement (PMC3637786)
Supplement: 1303645110_sapp.pdf [file 1303645110_sapp.pdf]

SUPPLEMENTARY INFORMATION APPENDIX

SI FIGURES

**Fig. S1. Cartoon representation of the DV-E homodimer.** The E-protein monomer has three domains, EDI (red), EDII (yellow) and EDIII (blue). The fusion loop located on EDII domain is colored in green; the A-strand epitope on EDIII domain is colored in magenta.

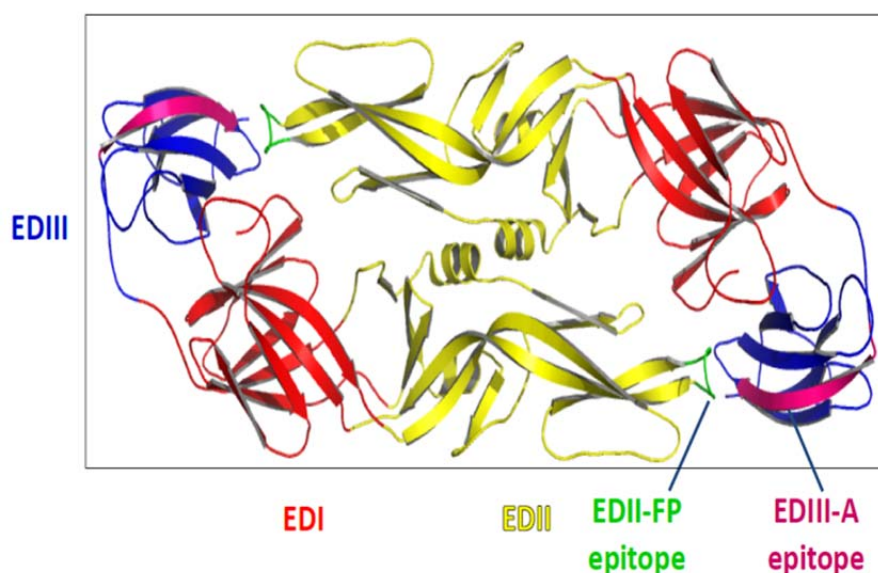

**Fig. S2. *In vitro* activity determined by FRNT, with error bars representing standard deviation. Affinity values determined by competition ELISA.**

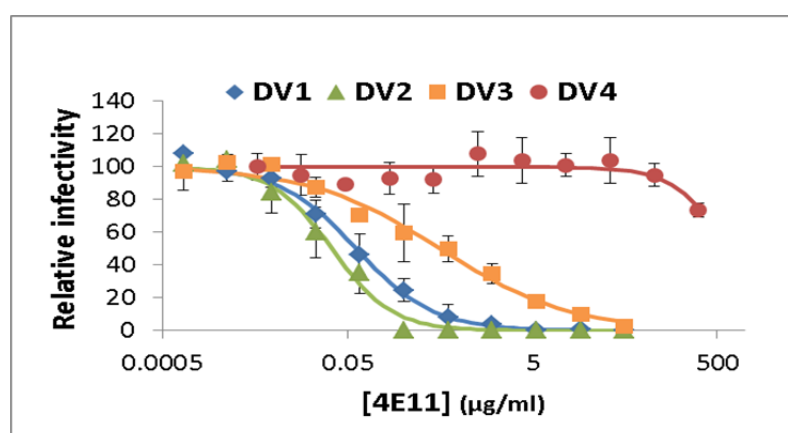

| EDIII-DV1<br>$K_D$ (nM) | EDIII-DV2<br>$K_D$ (nM) | EDIII-DV3<br>$K_D$ (nM) | EDIII-DV4<br>$K_D$ (nM) |
|-------------------------|-------------------------|-------------------------|-------------------------|
| 0.328                   | 5.20                    | 21.8                    | 40,793                  |

Fig. S3. Physicochemical determinants of protein-protein interaction.

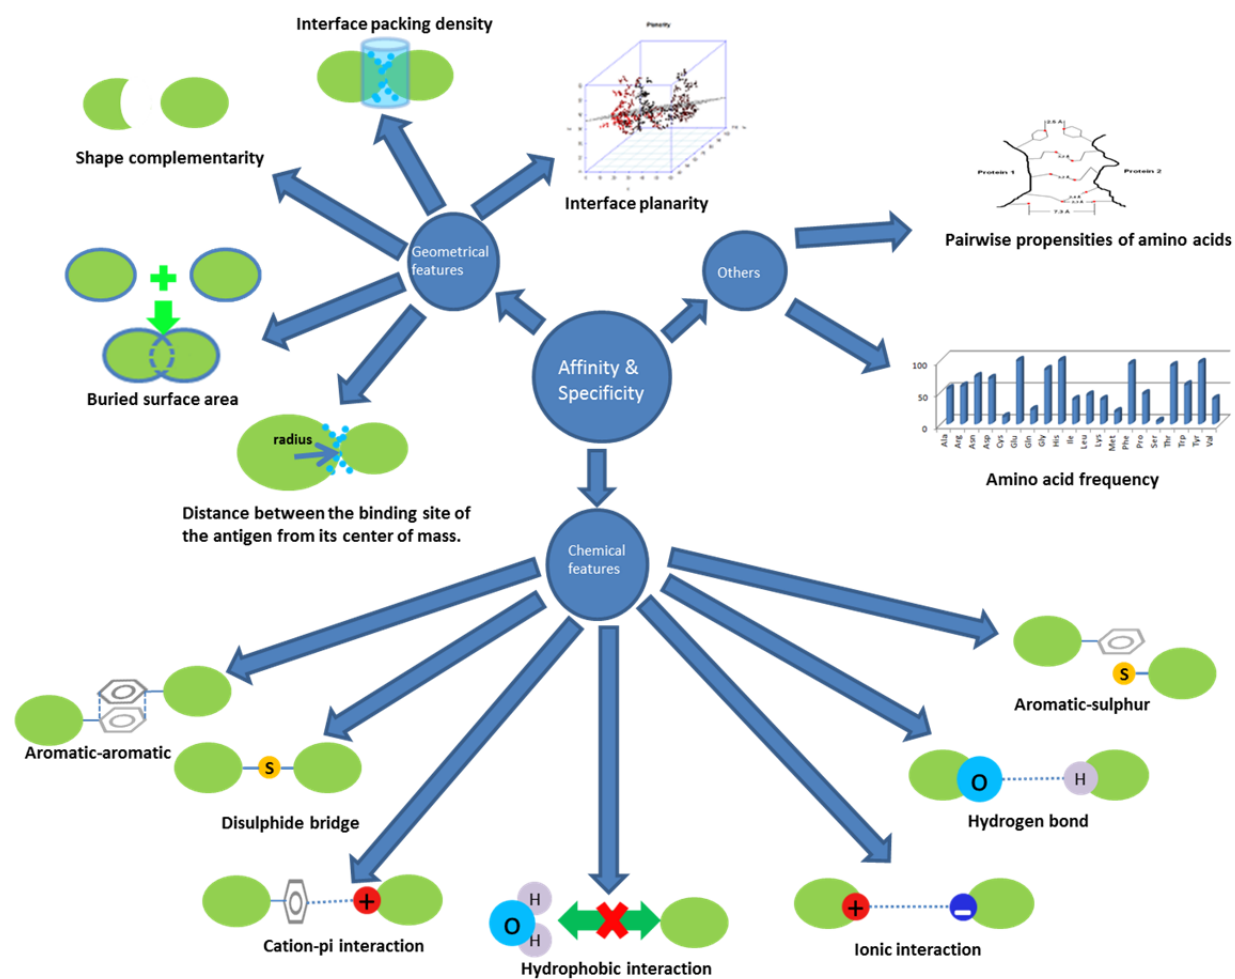

**Fig. S4. Computer generated decoy models for PDB: 2B2X (antigen: integrin VLA1; antibody: Fab of AQC2 variant).** Each point on the surface plot represents a docking decoy (one hundred decoys in total). The x-axis represents the ZRANK score; y-axis represents the ligand interface RMSD (in Å) to the crystal structure; z axis represents the MLR-based prediction probability. ZRANK scores of native-like structures vary between -60 to -30 Kcal/mol. The maximal ligand interface RMSD difference between structures having similar ZRANK scores (variation less than -3Kcal/mol) is 36 Å. The structure that received the lowest ZRANK score has ligand interface RMSD value of 40 Å. Using Pearson's correlation test, a significant positive linear relationship exists between MLR-based probability and RMSD (correlation coefficient: -0.25; p-value: 0.012). On the other hand, ZRANK does not have any linear correlation with RMSD (correlation coefficient: -0.01; p-value: 0.921) or MLR-probability (correlation coefficient: 0.1 and p-value: 0.3).

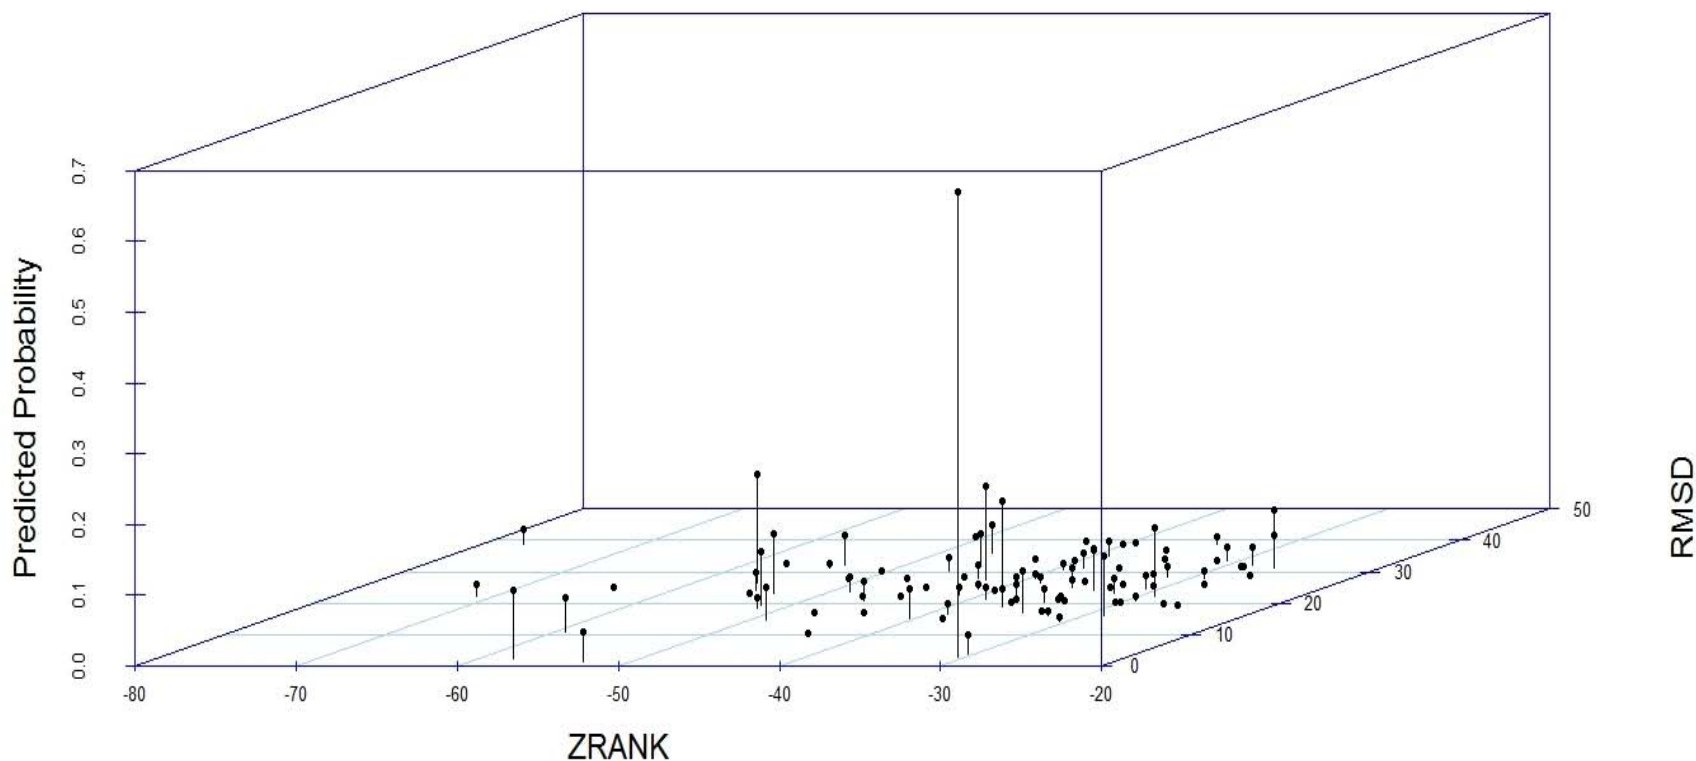

**Fig. S5. Amino acid frequencies in paratope and epitope.** Data generated from 84 antigen-antibody complexes.

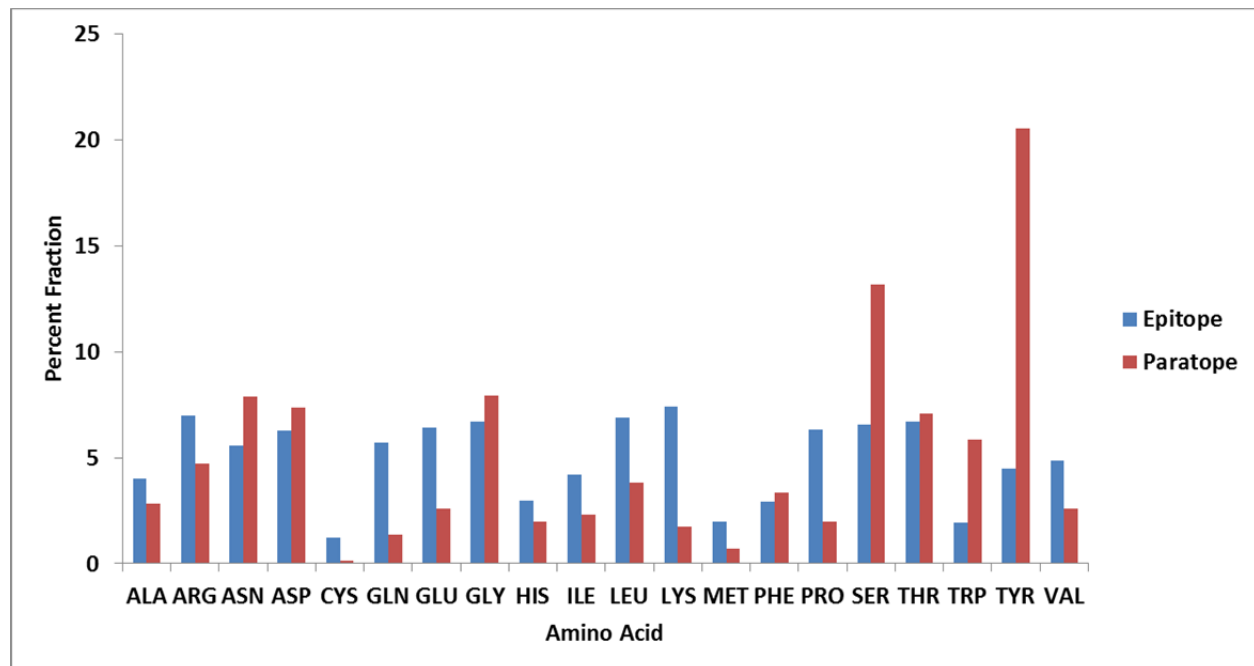

**Fig. S6. Flowchart of the antibody design approach.**

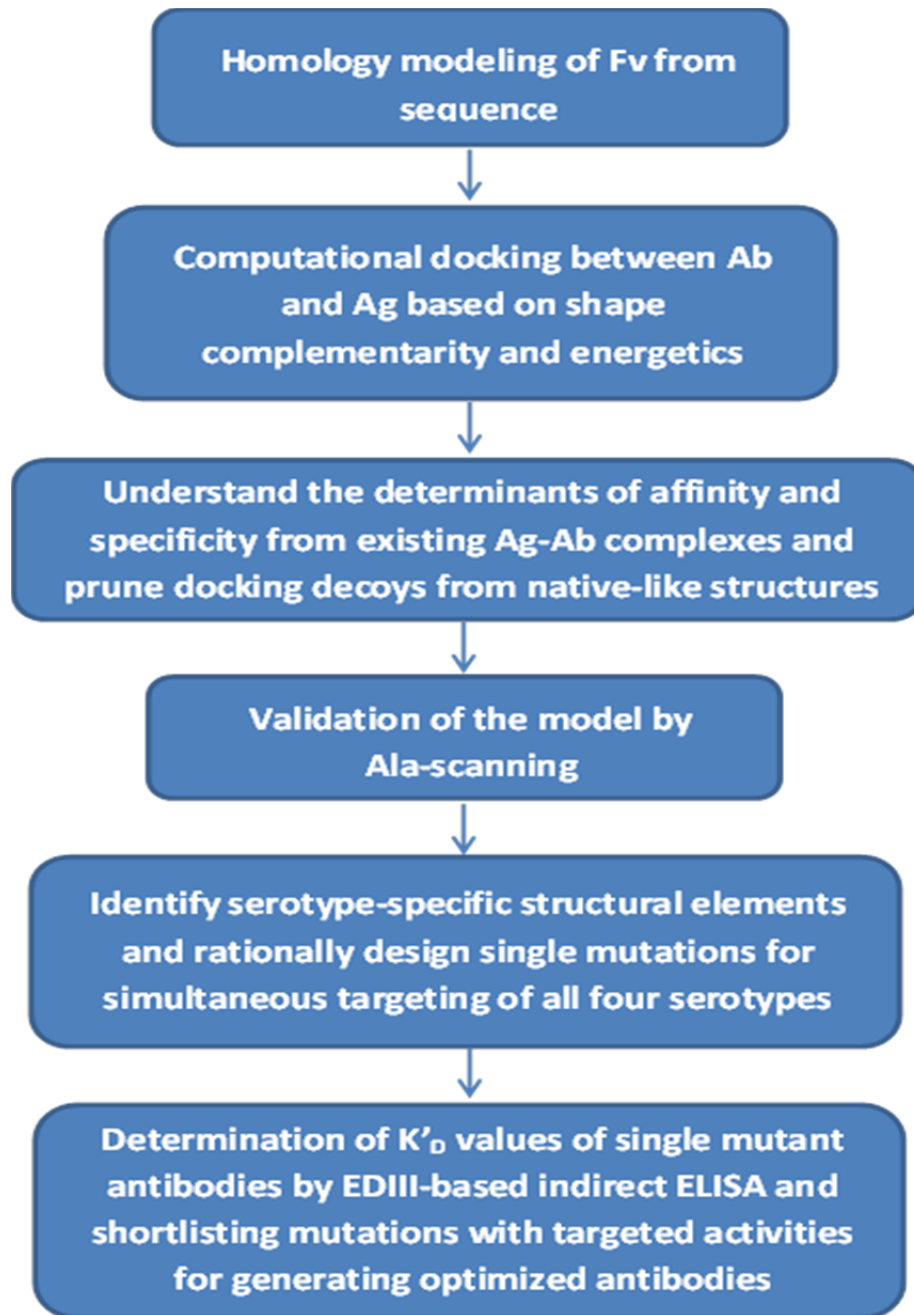

**Fig. S7. Superposition of the top five docking models on fixed ED-III.** ED-III is represented as spheres; 4E11, displayed as surface in each model, is colored differently, for clarity.

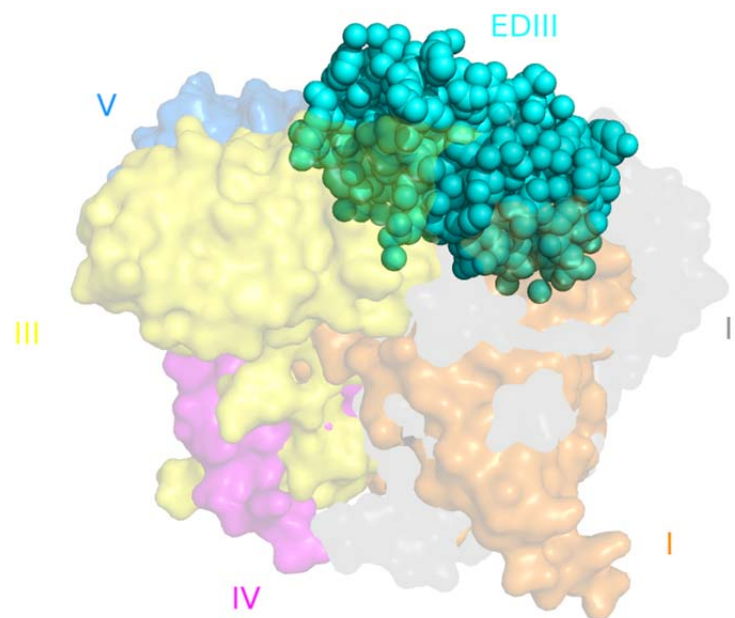

**Fig. S8. Affinity-enhancing mutations localize to the periphery of the 4E11:EDIII-DV4 interface.** The positive positions identified in the binding screen are highlighted (red) in a structural model of 4E11:EDIII-DV4 interaction. All successful mutations are located at the periphery of the binding interface. The two panels represent different views of the same model. EDIII, VH, and VL proteins are represented by blue, green, and yellow, respectively.

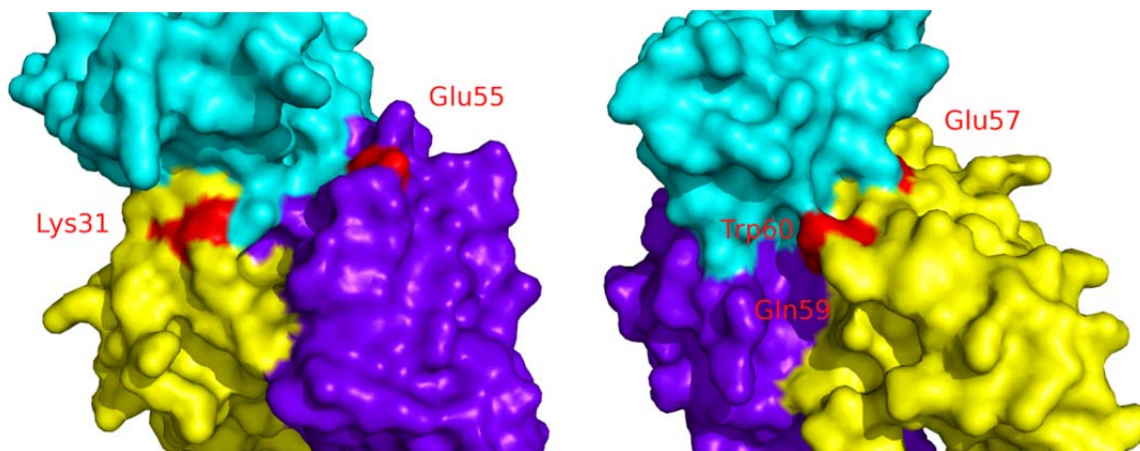

**Fig. S9.** SPR sensorgrams of 4E11 WT and 4E5A with antigens EDIII of DV1-4.

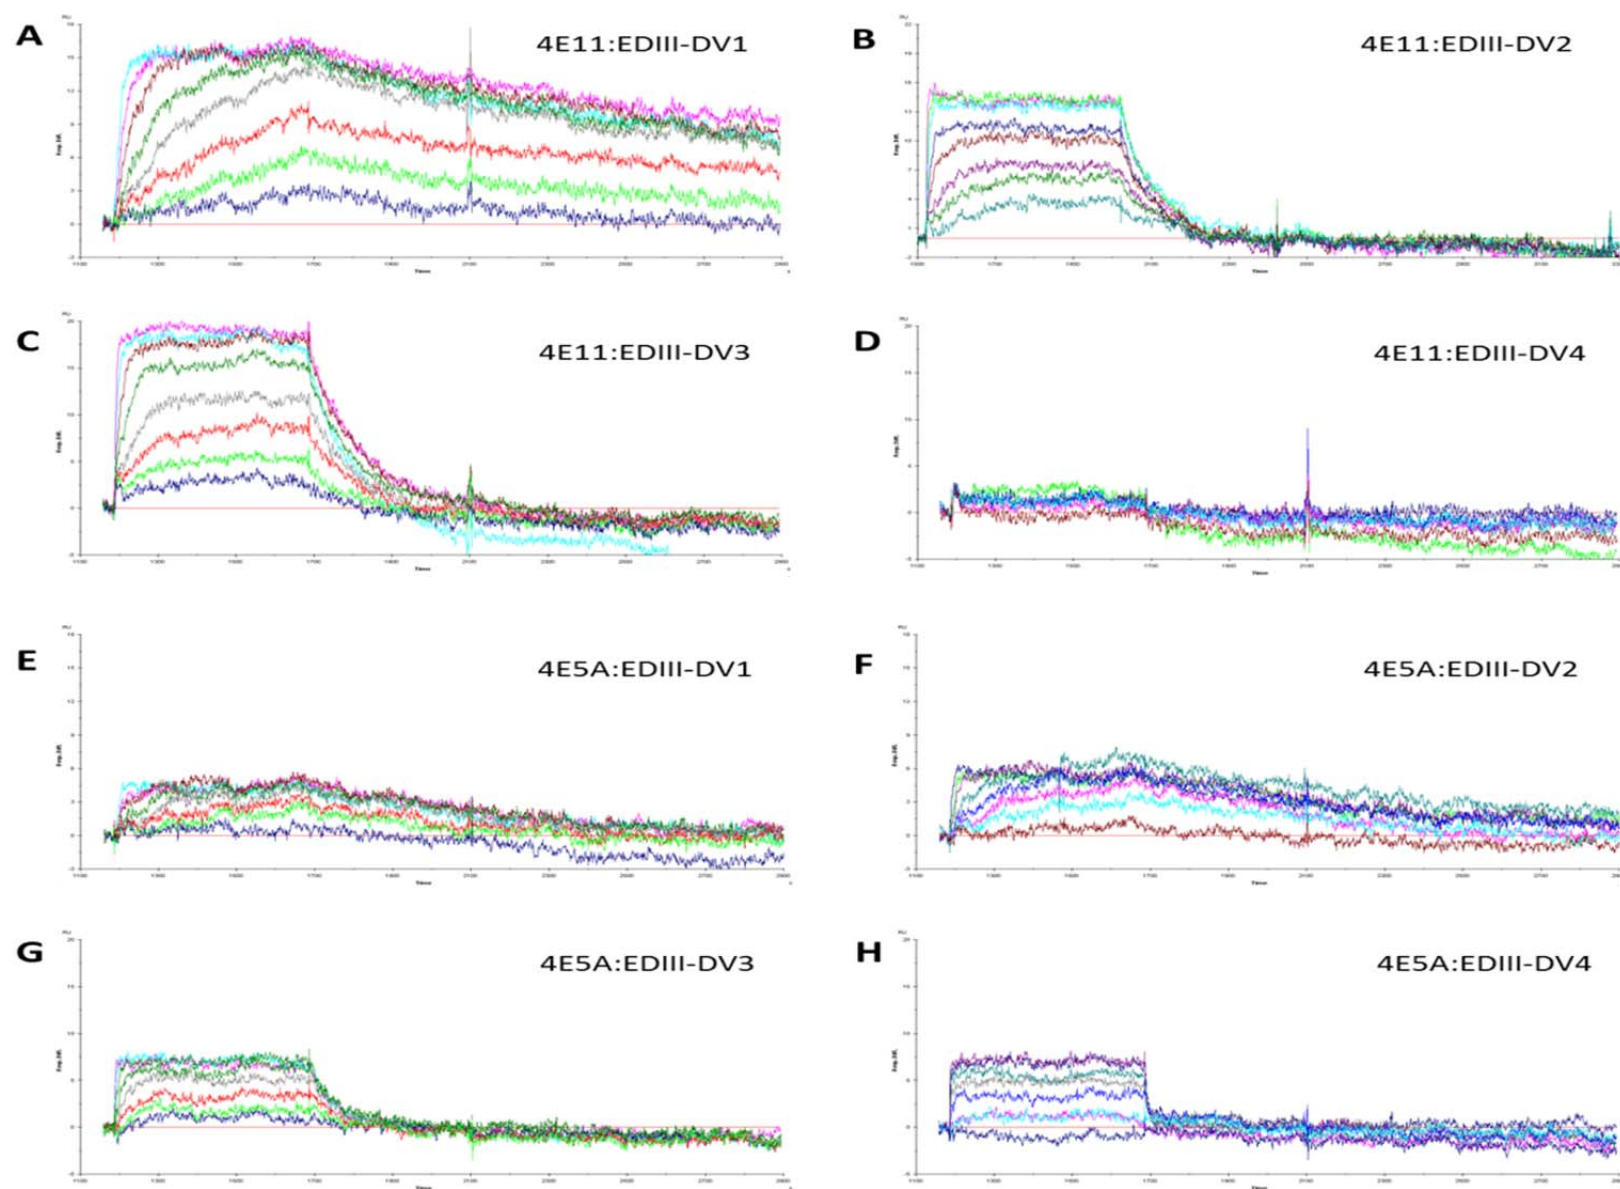

## SI TABLES

**Table S1. Description of physicochemical features.**

| Feature No.     | Description of feature                                                                                                              | Feature sub-classification/Additional note                                                                                                           |
|-----------------|-------------------------------------------------------------------------------------------------------------------------------------|------------------------------------------------------------------------------------------------------------------------------------------------------|
| <b>Chemical</b> |                                                                                                                                     |                                                                                                                                                      |
| 1               | Number of various types of interactions                                                                                             | (1) hydrophobic, (2) disulfide bridges, (3) hydrogen bond, (4) ionic interactions, (5) aromatic-aromatic, (6) aromatic-sulfur, (7) cation-pi         |
| 2               | Density of each type of interactions (i.e. how many contacts of each type is observed on average per 100 square Å of the interface) | (1) hydrophobic, (2) disulfide bridges, (3) hydrogen bond, (4) ionic interactions, (5) aromatic-aromatic, (6) aromatic-sulfur, (7) cation-pi         |
| 3               | Classification of hydrogen-bonds                                                                                                    | (1) main chain - main chain, (2) main chain - side chain, (3) side chain - side chain                                                                |
| 4               | Number of hydrogen bonds that involve charged residues                                                                              |                                                                                                                                                      |
| 5               | Composition of chemical groups                                                                                                      | (1) polar, (2) neutral and (3) non-polar                                                                                                             |
| 6               | ZEPII                                                                                                                               | Assesses the frequencies of favorable epitope-paratope inter-residue interactions to indicate the probability of antibody binding to a given surface |
| <b>Physical</b> |                                                                                                                                     |                                                                                                                                                      |
| 7               | Buried surface area                                                                                                                 |                                                                                                                                                      |
| 8               | Planarity                                                                                                                           |                                                                                                                                                      |
| 9               | Surface complementarity                                                                                                             |                                                                                                                                                      |
| 10              | Interface atom packing density                                                                                                      |                                                                                                                                                      |
| 11              | Distance between the binding site of the antigen from its center of mass                                                            |                                                                                                                                                      |

**Table S2. Training data set of antigen – antibody complexes (total number of complexes = 40).**

| Code | Name                                                                                                                                                                           | Antigen-Antibody Complex                                   | Antigen  |         | Antibody    |          |
|------|--------------------------------------------------------------------------------------------------------------------------------------------------------------------------------|------------------------------------------------------------|----------|---------|-------------|----------|
|      |                                                                                                                                                                                |                                                            | Chain(s) | Size    | Chain(s)    | Size     |
| 1F58 | Igg1 Antibody 58.2 / Protein (Exterior Membrane Glycoprotein (gp 120)                                                                                                          | Fab 58.2 W/ HIV-1 Gp120 Peptide                            | P        | 23      | L,H         | 216,228  |
| 1OSP | Crystal Structure Of Outer Surface Protein A Of Borrelia Burgdorferi Complexed With A Murine Monoclonal Antibody Fab                                                           | Fab184.1/ OspA_S84c                                        | O        | 257     | L,H         | 214,218  |
| 1BGX | Taq Polymerase In Complex With Tp7, An Inhibitory Fab                                                                                                                          | Fab Tp7/ Taq Dna Polymerase                                | T        | 832     | L,H         | 210,213  |
| 1FE8 | Crystal Structure Of The Von Willebrand Factor A3 Domain In Complex With A Fab Fragment Of Igg Ru5 That Inhibits Collagen Binding                                              | Fab Ru5 W/ Vwf A3                                          | A,B,C    | 196     | L,M,N,H,I,J | 210, 211 |
| 1NFD | An Alpha-Beta T Cell Receptor (Tcr) Heterodimer In Complex With An Anti-Tcr Fab Fragment Derived From A Mitogenic Antibody                                                     | Fab H57 W/ Tcr                                             | B,D      | 239     | L,H         | 212,222  |
| 1ORS | Membrane Protein X-Ray Structure Of The Kvap Potassium Channel Voltage Sensor In Complex With An Fab                                                                           | Fab 33H1 W/Potassium Channel                               | C        | 132     | A,B         | 214,221  |
| 1KB9 | Yeast Cytochrome Bc1 Complex                                                                                                                                                   | Fv w/ ubiquinol-cytochrome c reductase iron-sulfur subunit | E        | 185     | K,J         | 107,127  |
| 1AR1 | Complex (Oxidoreductase/Antibody) Structure At 2.7 Angstrom Resolution Of The Paracoccus Denitrificans Two-Subunit Cytochrome C Oxidase Complexed With An Antibody Fv Fragment | Fv w/ cytochrome c oxidase                                 | A,B      | 558,298 | C,D         | 120,127  |

| Code | Name                                                                                                                            | Antigen-Antibody Complex                                 | Antigen  |             | Antibody |         |
|------|---------------------------------------------------------------------------------------------------------------------------------|----------------------------------------------------------|----------|-------------|----------|---------|
|      |                                                                                                                                 |                                                          | Chain(s) | Size        | Chain(s) | Size    |
| 1N8Z | Transferase Crystal Structure Of Extracellular Domain Of Human Her2 Complexed With Herceptin Fab                                | Fab Herceptin W/ Receptor Protein-Tyrosine Kinase ErbB-2 | C        | 607         | A,B      | 214,220 |
| 1RJL | Immune System Structure Of The Complex Between OSpB-Ct And Bactericidal Fab-H6831                                               | Fab H6831 W/ Outer Surface Protein B                     | C        | 95          | A,B      | 212,221 |
| 1TZI | Immune System Crystal Structure Of The Fab Yads2 Complexed With H-Vegf                                                          | Fab YADS2 W/ VEGF                                        | V        | 102         | A,B      | 242,222 |
| 1NLO | Immune System Crystal Structure Of Human Factor IX Gla Domain In Complex Of An Inhibitory Antibody, 10c12                       | Fab 10C12 W/ Human Factor IX GLA Domain                  | G        | 51          | L,H      | 213,224 |
| 1UAC | Immune System/Hydrolase Crystal Structure Of HyHEL-10 Fv Mutant Sfsf Complexed With Turkey White Lysozyme                       | Fv HYHEL-10 W/ Lysozyme                                  | Y        | 129         | L,H      | 107,114 |
| 1H0D | Immune System/Hydrolase Crystal Structure Of Human Angiogenin In Complex With Fab Fragment Of Its Monoclonal Antibody Mab 26-2f | Fab 26-2F W/ Angiogenin                                  | C        | 123         | A,B      | 216,223 |
| 1V7M | Immune System/Cytokine Human Thrombopoietin Functional Domain Complexed To Neutralizing Antibody Tn1 Fab                        | Fab TN1 W/ human thrombopoietin                          | V        | 163         | L,H      | 213,217 |
| 1W72 | Immune System Crystal Structure Of Hla-A1:MAGE-A1 In Complex With Fab-Hyb3                                                      | Fab HYB3 W/ HLA-A1:MAGE-A1                               | A,C,D    | 274, 9, 274 | L,H      | 210,223 |

| Code | Name                                                                                                                                                         | Antigen-Antibody Complex                         | Antigen  |      | Antibody |         |
|------|--------------------------------------------------------------------------------------------------------------------------------------------------------------|--------------------------------------------------|----------|------|----------|---------|
|      | Chain(s)                                                                                                                                                     | Size                                             | Chain(s) | Size |          |         |
| 1FNS | Crystal Structure Of The Von Willebrand Factor (Vwf) A1 Domain I546v Mutant In Complex With The Function Blocking Fab Nmc4                                   | Fab Nmc-4 W/ Vwf A1 I546V                        | A        | 196  | L,H      | 214,225 |
| 1NMB | The Structure Of A Complex Between The Nc10 Antibody And Influenza Virus Neuraminidase And Comparison With The Overlapping Binding Site Of The Nc41 Antibody | Fab Nc10 W/ Influenza Neuraminidase N9           | N        | 470  | L,H      | 109,122 |
| 1JPS | Crystal Structure Of Tissue Factor In Complex With Humanized Fab D3h44                                                                                       | Fab D3h44 W/ Tissue Factor                       | T        | 219  | L,H      | 214,225 |
| 1OAZ | Ige Fv Spe7 Complexed With A Recombinant Thioredoxin                                                                                                         | Fv Spe7 W/ Trx-Shear3_1-123                      | A        | 123  | L,H      | 110,122 |
| 1WEJ | Igg1 Fab Fragment (Of E8 Antibody) Complexed With Horse Cytochrome C At 1.8 A Resolution                                                                     | Fab E8 W/ Cytochrome C                           | F        | 105  | L,H      | 214,223 |
| 1JRH | Antibody A6 / INTERFERON-GAMMA RECEPTOR                                                                                                                      | Fab A6 W/ Ifgammara Alpha                        | I        | 108  | L,H      | 213,219 |
| 1BJ1 | Fab Fragment / Vascular Endothelial Growth Factor                                                                                                            | Fab Antivegf(Humanized) W/VEGF                   | V,W      | 102  | L,J,H,K  | 214,231 |
| 1FDL | Igg1-Kappa D1.3 Fab / Hen Egg White Lysozyme                                                                                                                 | Fab D1.3 W/ HEL                                  | Y        | 129  | L,H      | 214,218 |
| 1MLC | Igg1-Kappa D44.1 / Hen Egg White Lysozyme                                                                                                                    | Fab D44.1 W/HEL                                  | E,F      | 129  | A,C,B,D  | 214,218 |
| 1P2C | Light Chain Anti-Lysozyme Antibody F10.6.6 / Heavy Chain Vh+Ch1 Anti-Lysozyme Antibody F10.6.6 / Lysozyme C                                                  | Fab F10.6.6.(Affinity Maturation Of D44.1) W/HEL | C,F      | 129  | A,D,B,E  | 212,218 |
| 1FBI | Igg1 F9.13.7 Fab / Guinea Fowl Lysozyme                                                                                                                      | Fab F9.13.7 W/ GEL (Guinea Fowl)                 | X,Y      | 129  | L,P,H,Q  | 214,221 |
|      |                                                                                                                                                              |                                                  |          |      |          |         |

| Code | Name                                                                                                   | Antigen-Antibody Complex                                          | Antigen  |          | Antibody |         |
|------|--------------------------------------------------------------------------------------------------------|-------------------------------------------------------------------|----------|----------|----------|---------|
|      | Chain(s)                                                                                               | Size                                                              | Chain(s) | Size     |          |         |
| 1BQL | Hyhel-5 Fab / Bobwhite Quail Lysozyme                                                                  | Fab Hyhel-5 W/ BWQL (Bobwhite Quail Lysozyme)                     | Y        | 129      | L,H      | 212,215 |
| 1DQJ | Anti-Lysozyme Antibody Hyhel-63 / Lysozyme                                                             | Fab Hyhel-63 W/ HEL                                               | C        | 129      | A,B      | 214,210 |
| 1JHL | Igg1-Kappa D11.15 Fv / Pheasant Egg White Lysozyme                                                     | Fv D11.15 W/PEL (Pheasant Egg White Lysozyme Heteroclitic W/HEL)) | A        | 129      | L,H      | 108,116 |
| 1C08 | Anti-Hen Egg White Lysozyme Antibody (Hyhel -10) / Lysozyme                                            | Fv Hyhel-10 W/ HEL                                                | C        | 129      | A,B      | 107,114 |
| 1BVK | Hulys11 / Lysozyme                                                                                     | Fv(Hu) D1.3 W/ HEL                                                | C,F      | 129      | A,D,B,E  | 108,117 |
| 1E6J | Immunoglobulin / CAPSID PROTEIN P24                                                                    | Fab 13B5 W/ HIV-1 P24                                             | P        | 210      | L,H      | 210,219 |
| 1A2Y | Hen Egg White Lysozyme, D18A Mutant, In Complex With Mouse Monoclonal Antibody D1.3                    | Fv D1.3 W/ Hen Egg White Lysozyme Mutant                          | C        | 129      | A, B     | 107,116 |
| 1EGJ | Immune System Domain 4 Of The Beta Common Chain In Complex With An Antibody                            | Fab BION-1 W/ IL-5 Receptor                                       | A        | 101      | L,H      | 215,220 |
| 1LK3 | Interlukin-10 / 9D7                                                                                    | Fab 9D7 W/ IL-10(Hu)                                              | A,B      | 160      | L,M,H,I  | 210,219 |
| 1EO8 | Influenza Virus Hemagglutinin Complexed With A Neutralizing Antibody                                   | Fab BH151 W/ Hemagglutinin 9HA1 & HA2 Chains)                     | A,B      | 328, 175 | L, H     | 210,217 |
| 1ADQ | Igg4 Rea Fc / Igm-Lambda Rf-An Fab                                                                     | Fab Igmrfh W/ Fc                                                  | A        | 206      | L,H      | 213,225 |
| 1QFU | Protein (Hemagglutinin (Ha1 Chain)) / Protein (Immunoglobulin Igg1-Kappa Antibody Light & Heavy Chain) | Fab NC10 W/ Infuenza Hemagglutinin                                | A,B      | 328, 184 | L,H      | 217,223 |
| 1NMC | Neuraminidase / Single Chain Antibody                                                                  | Scfv NC10 W/ Infuenza Virus Neuraminidase                         | A,N      | 388      | B,H,C,L  | 122,190 |

**Table S3. Testing data set of antigen – antibody complexes (total number of complexes = 44).**

| Code | Name                                                                                             | Additional Info                          | Antigen  | Antibody | Chain(s) | Size     |
|------|--------------------------------------------------------------------------------------------------|------------------------------------------|----------|----------|----------|----------|
|      |                                                                                                  |                                          | Chain(s) | Size     |          |          |
| 2BDN | Small Inducible Cytokine A2 / Antibody Light & Heavy Chain 11k2                                  | Fab 11K2 W/MCP-1                         | A        | 76       | L,H      | 214, 217 |
| 2R69 | Major Envelope Protein E / Light & Heavy Chain Of 1A1D-2                                         | Fab 1A1D-2 W/ Dengue Virus E-DIII        | A        | 97       | L,H      | 212, 214 |
| 1ZTX | Envelope Protein / Heavy & Light Chain Of E16 Antibody                                           | Fab E16 W/Wnilevirus Protein DIII        | E        | 108      | L,H      | 212, 219 |
| 1YQV | Hyhel-5 Antibody Light & Heavy Chain / Hen Egg White Lysozyme                                    | Fab Hyhel-5 W/ HEL                       | Y        | 129      | L,H      | 211, 215 |
| 2JEL | Jel42 Fab Fragment / Histidine-Containing Protein                                                | Fab JEL42 W/Hpr (PEP:Phosphotransferase) | P        | 85       | L,H      | 217, 218 |
| 2Q8B | Apical Membrane Antigen 1 / 1f9 Light & Heavy Chain                                              | Fab 1F9 W/ AMA1(Malaria Antigen)         | A        | 336      | L,H      | 214, 210 |
| 2R0K | Poly(A)-Specific Ribonuclease                                                                    | Fab 58 W/ HGFA                           | A        | 283      | L,H      | 214, 225 |
| 2B2X | Integrin Alpha-1 / Antibody Aqc2 Fab Heavy & Light Chain                                         | Fab ACQ W/ Integrin-Alpha-1 (VLA1)       | A,B      | 223      | H,I,L,M  | 226, 213 |
| 2NY7 | Envelope Glycoprotein GP120 / T-Cell Surface Glycoprotein CD4 / Antibody 17B Light & Heavy Chain | Fab B12 W/ HIV-1 Gp120                   | G        | 317      | L,H      | 215, 230 |

| Code | Name                                                                                                                     | Additional Info                                 | Antigen  | Antibody |          |          |
|------|--------------------------------------------------------------------------------------------------------------------------|-------------------------------------------------|----------|----------|----------|----------|
|      |                                                                                                                          |                                                 | Chain(s) | Size     | Chain(s) | Size     |
| 2J4W | Apical Membrane Antigen 1 / FAB Fragment Of Monoclonal Antibody F8.12.19                                                 | Fab F8.12.19 W/ Plasmodium Vivax Membrane Ag    | D        | 445      | L,H      | 213, 225 |
| 2DD8 | Igg Heavy & Light Chain / Spike Glycoprotein                                                                             | Fab M396 W/SARS-Cov Spike RBD                   | S        | 202      | H,L      | 245, 213 |
| 2AEQ | Neuraminidase / Fab Light & Heavy Chain                                                                                  | Fab MEM5 W/ Influenza Neuraminidase             | A        | 395      | L,H      | 214, 217 |
| 2B4C | Envelope Glucoprotein / T-Cell Surface Glycoprotein Cd4 / Anti-Hiv-1 Gp120 Immunoglobulin X5 Light & Heavy Chain         | Fab X5 W/ HIV-1 Gp120 V3                        | G, C     | 344, 181 | L, H     | 215, 235 |
| 2UZI | Anti-Ras Fv Heavy & Light Chain / Gtpase Hras                                                                            | Fv Anti-Ras W/ HRAS                             | R        | 166      | L,H      | 114, 104 |
| 1XIW | T-Cell Surface Glycoprotein Cd3 Epsilon Chain, Delta Chain / Immunoglobulin Light & Heavy Chain Variable Region          | Scfv UCHT1 W/ CD3e/D                            | A,E,B,F  | 105, 79  | C,G, D,H | 108, 122 |
| 3EO1 | Structure Of The Fab Fragment Of Gc-1008 In Complex With Transforming Growth Factor-Beta 3                               | Fab GC1008 W/ transforming growth factor-beta 3 | C        | 112      | A,B      | 215,225  |
| 1YJD | Crystal Structure Of Human Cd28 In Complex With The Fab Fragment Of A Mitogenic Antibody (5.11a1)                        | Fab 5.11A1 W/ CD28                              | C        | 140      | L,H      | 212,222  |
| 2FD6 | Structure Of Human Urokinase Plasminogen Activator In Complex With Urokinase Receptor And An Anti-Upar Antibody At 1.9 A | Fab W/ Urokinase-Type Plasminogen Activator     | A,U      | 276,122  | L,H      | 214,213  |

| Code | Name                                                                                                                                          | Additional Info                          | Antigen  | Antibody |          |         |
|------|-----------------------------------------------------------------------------------------------------------------------------------------------|------------------------------------------|----------|----------|----------|---------|
|      |                                                                                                                                               |                                          | Chain(s) | Size     | Chain(s) | Size    |
| 3EOA | Crystal Structure The Fab Fragment Of Efalizumab In Complex With Lfa-1 I Domain, Form I                                                       | Fab EFALIZUMAB W/ LFA-1 I Domain,        | J        | 181      | L,H      | 214,220 |
| 2GHW | Crystal Structure Of Sars Spike Protein Receptor Binding Domain In Complex With A Neutralizing Antibody, 80r                                  | Fab 80R W/ SARS Protein                  | A        | 203      | B        | 247     |
| 2VXQ | Crystal Structure Of The Major Grass Pollen Allergen Phl P 2 In Complex With Its Specific Ige-Fab                                             | Fab Ige W/ grass pollen allergen PHL P 2 | A        | 96       | L,H      | 214,216 |
| 3ETB | Crystal Structure Of The Engineered Neutralizing Antibody M18 Complexed With Anthrax Protective Antigen Domain 4                              | Fv M18 W/ Anthrax Protective Antigen     | J        | 144      | F        | 252     |
| 1YY9 | Structure Of The Extracellular Domain Of The Epidermal Growth Factor Receptor In Complex With The Fab Fragment Of Cetuximab/Erbitux/Imc- C225 | Fab CETUXIMAB W/ EGFR                    | A        | 624      | C,D      | 213,221 |
| 2H9G | Crystal Structure Of Phage Derived Fab Bdf1 With Human Death Receptor 5 (Dr5)                                                                 | FAB BDF1 W/ human death receptor 5 (     | S        | 130      | L,H      | 214,228 |
| 2VXS | Structure Of Il-17a In Complex With A Potent, Fully Human Neutralising Antibody                                                               | Fab CAT2200 W/ IL-17A                    | A        | 137      | L,H      | 216,225 |
| 3FKU | Crystal Structure Of Influenza Hemagglutinin (H5) In Complex With A Broadly Neutralizing Antibody F10                                         | Fv F10 W/ Influenza Hemagglutinin        | E,F      | 338,182  | X        | 280     |

| Code | Name                                                                                                                                           | Additional Info                             | Antigen  | Antibody |          |         |
|------|------------------------------------------------------------------------------------------------------------------------------------------------|---------------------------------------------|----------|----------|----------|---------|
|      |                                                                                                                                                |                                             | Chain(s) | Size     | Chain(s) | Size    |
|      |                                                                                                                                                |                                             |          |          |          |         |
| 2HFG | Crystal Structure Of Hbr3 Bound To Cb3s-Fab                                                                                                    | Fab CB3S W/ HBR3                            | R        | 51       | L,H      | 214,232 |
| 2VXT | Crystal Structure Of Human Il-18 Complexed To Murine Reference Antibody 125-2h Fab                                                             | Fab 125-2H W/ IL-18                         | I        | 157      | L,H      | 214,216 |
| 2AEP | An Epidemiologically Significant Epitope Of A 1998 Influenza Virus Neuraminidase Forms A Highly Hydrated Interface In The Na-Antibody Complex. | Fab Mem5 W/ Influenza NA                    | A        | 395      | L,H      | 214,217 |
| 2IH3 | Ion Selectivity In A Semi-Synthetic K <sup>+</sup> Channel Locked In The Conductive Conformation                                               | Fab W/ Voltage-Gated Potassium Channel      | C        | 122      | B,A      | 212,219 |
| 2W9E | Structure Of Icsm 18 (Anti-Prp Therapeutic Antibody) Fab Fragment Complexed With Human Prp Fragment 119-231                                    | ICSM 18-Anti-Prp Fab W/ Human Prion Protein | A        | 113      | L,H      | 212,215 |
| 3G6D | Crystal Structure Of The Complex Between Cnto607 Fab And Il-13                                                                                 | Fab CNTO607 W/ IL-13                        | A        | 113      | L,H      | 213,229 |
| 2ZJS | Crystal Structure Of Secye Translocon From Thermus Thermophilus With A Fab Fragment                                                            | Fab Anti-Secy W/ Secye Translocon           | E,Y      | 60,434   | L,H      | 214,221 |
| 3GI9 | Crystal Structure Of Apct Transporter Bound To 7f11 Monoclonal Fab Fragment                                                                    | Fab 7F11 W/ APCT Transporter                | C        | 444      | L,H      | 220,223 |
| 2ZUQ | Crystal Structure Of Dsbb-Fab Complex                                                                                                          | Fab W/ Disulfide Bond Formation Protein B   | A        | 176      | B,C      | 239,221 |
| 3GRW | FGFR3 In Complex With A Fab                                                                                                                    | Fab R3Mab W/ FGFR3                          | A        | 241      | L,H      | 214,235 |
|      |                                                                                                                                                |                                             |          |          |          |         |

| Code | Name                                                                                                              | Additional Info                                                   | Antigen Chain(s) | Antibody Size | Chain(s) | Size    |
|------|-------------------------------------------------------------------------------------------------------------------|-------------------------------------------------------------------|------------------|---------------|----------|---------|
| 3B9K | Crystal Structure Of Cd8alpha-Beta In Complex With Yts 156.7 Fab                                                  | Fab YTS156.7 W/ CD8ALPHA-BETA                                     | A,B              | 131,125       | L,H      | 213,214 |
| 3H42 | Crystal Structure Of PCSK9 In Complex With Fab From LDLR Competitive Antibody                                     | Fab Mab1 W/ Proprotein Convertase Subtilisin/Kexin Type 9 (PCSK9) | A,B              | 126,540       | L,H      | 217,238 |
| 3BSZ | Crystal Structure Of The Transthyretin-Retinol Binding Protein-Fab Complex                                        | Fab Anti-Retinol-Binding Protein W/ Transthyretin-Retinol         | A,E              | 127,176       | L,H      | 215,215 |
| 3HI6 | Crystal Structure Of Intermediate Affinity I Domain Of Integrin LFA-1 With The Fab Fragment Of Its Antibody AL-57 | Fab AL-57 W/ Integrin LFA-1                                       | A                | 180           | L,H      | 212,220 |
| 2CMR | Crystal Structure Of The Hiv-1 Neutralizing Antibody D5 Fab Bound To The Gp41 Inner-Core Mimetic 5-Helix          | Fab D5 W/ HIV GP41 Helix                                          | A                | 226           | L,H      | 208,217 |
| 3EFD | The Crystal Structure Of The Cytoplasmic Domain Of Kcsa                                                           | Fab W/ Kcsa                                                       | K                | 30            | L,H      | 211,222 |
| 3NCY | X-Ray Crystal Structure Of An Arginine Agmatine Antiporter (Adic) In Complex With A Fab Fragment                  | Fab W/ Arginine Agmatine Antiporter                               | A                | 445           | S,P      | 211,219 |

**Table S4. Logistic regression coefficient, p-value and odds ratio of the significant physicochemical features.**

| <b>Features</b>       | <b>Coefficient</b> | <b>P-value</b> | <b>Odds ratio</b> |
|-----------------------|--------------------|----------------|-------------------|
| ZEPII                 | 9.05               | 2.27E-07       | 8518.537925       |
| Buried surface area   | -2.796             | 0.044027       | 0.06105379        |
| Hydrogen bond density | -6.384             | 0.000824       | 0.001688356       |
| Cation-pi density     | 2.066              | 0.047837       | 7.89318714        |

**Table S5. The 20X20 amino acid propensity matrix.** Paratope amino acids are indicated on the left side and epitope amino acids are indicated on the top side. The propensity data were generated using 84 non-redundant antigen-antibody complexes.

|     | ALA  | ARG  | ASN  | ASP  | CYS   | GLU  | GLN  | GLY  | HIS  | ILE  | LEU  | LYS  | MET  | PHE  | PRO  | SER  | THR  | TRP  | TYR  | VAL  |
|-----|------|------|------|------|-------|------|------|------|------|------|------|------|------|------|------|------|------|------|------|------|
| ALA | 0.25 | 0.59 | 0.14 | 0.53 | 0     | 0.28 | 0.6  | 0.35 | 1.33 | 0.68 | 1.1  | 0.33 | 2.3  | 2.94 | 0.77 | 0.25 | 0.38 | 1.49 | 0.59 | 1    |
| ARG | 0.58 | 0.87 | 1.11 | 2.29 | 0     | 1.75 | 0.87 | 0.67 | 0.95 | 1.03 | 0.99 | 0.44 | 0.79 | 0.75 | 0.15 | 0.5  | 0.66 | 0.29 | 2.24 | 0.57 |
| ASN | 0.74 | 1.32 | 1.04 | 0.94 | 0.72  | 1.28 | 1.32 | 1.08 | 1.94 | 1.03 | 0.33 | 1.05 | 1.53 | 0.54 | 0.74 | 0.78 | 0.58 | 0.83 | 0.82 | 0.41 |
| ASP | 0.23 | 1.68 | 0.81 | 0.6  | 0     | 0.75 | 0.54 | 0.79 | 1.04 | 0.4  | 1.27 | 2.2  | 0.62 | 0.58 | 0.51 | 0.84 | 1.08 | 0.89 | 1.05 | 0.27 |
| CYS | 5.29 | 0    | 0    | 5.59 | 36.02 | 0    | 0    | 2.46 | 0    | 0    | 0    | 0    | 0    | 6.85 | 2.68 | 0    | 0    | 0    | 0    | 4.17 |
| GLU | 0.22 | 1.41 | 0.6  | 0.23 | 0     | 0.36 | 0.39 | 0.2  | 0.57 | 0.39 | 0.14 | 0.85 | 0.39 | 0.56 | 0.44 | 0.75 | 0.55 | 0.85 | 0.17 | 0.34 |
| GLN | 0.44 | 0.2  | 0.72 | 0.23 | 0     | 0.48 | 0.26 | 0.61 | 0    | 0.78 | 0.82 | 0.38 | 0    | 0.57 | 0.44 | 0.65 | 0.44 | 0    | 1.02 | 0    |
| GLY | 0.31 | 1.01 | 0.57 | 0.49 | 1.06  | 1.37 | 0.99 | 0.72 | 0.68 | 0.56 | 0.39 | 0.9  | 0.76 | 0.94 | 0.89 | 0.51 | 0.84 | 0.61 | 0.97 | 0.74 |
| HIS | 0.55 | 0.64 | 0.76 | 0.87 | 0     | 0.91 | 1.15 | 0.51 | 0.73 | 0.49 | 0.52 | 0.6  | 1    | 0    | 0.84 | 0.27 | 0.56 | 0    | 0.43 | 0.65 |
| ILE | 0.31 | 0.57 | 0.17 | 0.32 | 0     | 0.34 | 0.73 | 0.14 | 1.2  | 0.55 | 1.33 | 0.66 | 2.22 | 1.58 | 0.31 | 0.45 | 0.92 | 3    | 2.36 | 1.2  |
| LEU | 0.42 | 0.88 | 0.7  | 0.22 | 0.72  | 0.7  | 0.63 | 0.59 | 1.12 | 1.51 | 1.98 | 0.83 | 1.16 | 1.37 | 0.86 | 0.52 | 0.43 | 2.09 | 1.64 | 1    |
| LYS | 0    | 0.31 | 0.37 | 0.71 | 0     | 1.86 | 0.4  | 0.16 | 0.89 | 0    | 0.42 | 0.59 | 0    | 1.31 | 0.17 | 0.67 | 0.17 | 1.33 | 0    | 0.27 |
| MET | 0    | 0.99 | 1.17 | 0    | 0     | 1.17 | 0.64 | 0.5  | 1.4  | 0.95 | 0    | 0    | 3.88 | 0    | 0.54 | 0    | 0    | 2.1  | 1.65 | 0.84 |
| PHE | 1.81 | 1.36 | 0.74 | 0.72 | 0.77  | 0.87 | 1.22 | 1.16 | 2.98 | 0.81 | 1.41 | 1.17 | 0.82 | 2.05 | 1.49 | 0.67 | 1.03 | 1.78 | 0.35 | 1.6  |
| PRO | 0.75 | 1.04 | 0.41 | 0.2  | 0     | 0.41 | 1.12 | 0.17 | 1.97 | 1    | 1.4  | 0.49 | 2.72 | 1.94 | 0.38 | 0.55 | 0.57 | 0.74 | 1.16 | 0    |
| SER | 1.12 | 1.27 | 0.62 | 0.93 | 1.37  | 1.64 | 1.54 | 0.6  | 1.16 | 0.43 | 1.25 | 0.97 | 1.02 | 1.04 | 0.73 | 0.83 | 0.93 | 1.42 | 1.43 | 0.82 |
| THR | 0.84 | 1.17 | 0.79 | 1.14 | 0     | 1.06 | 1.15 | 0.34 | 1.42 | 0.54 | 0.37 | 0.83 | 1.31 | 0.16 | 0.79 | 0.77 | 1.03 | 0.24 | 0.56 | 0.76 |
| TRP | 1.27 | 1.71 | 1.16 | 1.05 | 3.37  | 0.47 | 2.03 | 0.99 | 2.61 | 0.51 | 1.06 | 1.78 | 1.03 | 0.73 | 1    | 1.12 | 0.86 | 0.56 | 1.86 | 1.56 |
| TYR | 1.48 | 2.21 | 1.83 | 1.56 | 2.04  | 1.96 | 1.6  | 1.73 | 2.01 | 1.9  | 2.38 | 1.78 | 1.89 | 2.69 | 1.88 | 1.35 | 1.21 | 1.4  | 1.36 | 1.46 |
| VAL | 0.3  | 1.1  | 0.49 | 0.78 | 1.01  | 1.3  | 0.88 | 0.28 | 1.56 | 0.79 | 1.11 | 0.26 | 0.54 | 1.15 | 0.3  | 0.59 | 0.45 | 2.92 | 0.69 | 0.47 |

**Table S6. Mutations that increase EDIII-DV4 affinity while approximately maintaining affinity to EDIII of DV1-3.**

| Chain | CDR | Position | WT residue | Mutation |
|-------|-----|----------|------------|----------|
| VH    | H2  | 55       | Ala        | Glu      |
| VH    | H2  | 55       | Ala        | Asp      |
| VL    | L1  | 31       | Arg        | Lys      |
| VL    | L2  | 57       | Asn        | Glu      |
| VL    | L2  | 57       | Asn        | Ser      |
| VL    | L2  | 59       | Glu        | Gln      |
| VL    | L2  | 59       | Glu        | Asn      |
| VL    | L2  | 60       | Ser        | Trp      |
| VL    | L2  | 60       | Ser        | Tyr      |
| VL    | L2  | 60       | Ser        | Arg      |

**Table S7. Predicted contacts made by affinity-enhancing mutations.**

| Chain & CDR | Position | WT residue | Mutation | Predicted DV4 contacts                                 |
|-------------|----------|------------|----------|--------------------------------------------------------|
| VH – H2     | 55       | Ala        | Glu      | H-bond, Ionic contact with Lys (310), Lys (323)        |
|             |          |            | Asp      | H-bond, Ionic contact with Lys (310), Lys (323)        |
| VL – L1     | 31       | Arg        | Lys      | Ionic contact with Glu (311)                           |
| VL – L2     | 57       | Asn        | Glu      | Ionic contact with Lys (305)                           |
|             |          |            | Ser      | H-bond with Lys (310)                                  |
| VL – L2     | 59       | Glu        | Gln      | H-bond with Glu (327)                                  |
|             |          |            | Asn      | H-bond with Glu (327)                                  |
| VL – L2     | 60       | Ser        | Trp      | Hydrophobic contact with Ala (329)                     |
|             |          |            | Tyr      | H-bond with Glu (327)                                  |
|             |          |            | Arg      | Ionic, H-bond with Glu (327) and H-bond with Gly (328) |

**Table S8. Affinities of single mutant antibodies with increased EDIII-DV4 affinity and similar affinities to EDIII of DV1-3 relative to 4E11 WT.**

| Mutation | CDR | EDIII-DV1 K <sub>D</sub><br>(nM) | EDIII-DV2 K <sub>D</sub><br>(nM) | EDIII-DV3 K <sub>D</sub><br>(nM) | EDIII-DV4 K <sub>D</sub><br>(nM) |
|----------|-----|----------------------------------|----------------------------------|----------------------------------|----------------------------------|
| 4E11 WT  | -   | 0.328                            | 5.2                              | 21.8                             | 40,793                           |
| A55E     | H2  | 0.295                            | 0.323                            | 2.95                             | 4,442                            |
| R31K     | L1  | 0.378                            | 5.35                             | 21.1                             | 37,292                           |
| N57E     | L2  | 0.281                            | 1.75                             | 33.9                             | 8,408                            |
| E59Q     | L2  | 0.772                            | 10.8                             | 102                              | 11,034                           |
| S60W     | L2  | 0.284                            | 6.3                              | 23.1                             | 26,351                           |

**Table S9. Energetic calculations of 4E5A show mutations have additive effect on binding energy.**

| <b>Antibody</b> | <b>EDIII-DV4 <math>\Delta G</math><br/>(kcal/mol)<sup>a</sup></b> | <b>EDIII-DV4 <math>\Delta\Delta G</math><br/>(kcal/mol)<sup>b</sup></b> |
|-----------------|-------------------------------------------------------------------|-------------------------------------------------------------------------|
| 4E11 WT         | -5.98                                                             | ---                                                                     |
| VH-A55E         | -7.29                                                             | -1.31                                                                   |
| VL-R31K         | -6.03                                                             | -0.05                                                                   |
| VL-N57E         | -6.92                                                             | -0.93                                                                   |
| VL-E59Q         | -6.76                                                             | -0.77                                                                   |
| VL-S60W         | -6.24                                                             | -0.26                                                                   |
| 4E5A            | -9.59                                                             | -3.61                                                                   |

<sup>a</sup>Free energy calculated by  $\Delta G = RT\ln(K_D)$  at 25°C

<sup>b</sup> $\Delta\Delta G = \Delta G_{\text{mutant}} - \Delta G_{\text{WT}}$

**Table S10. Kinetic binding parameters for 4E11 and 4E5A measured by SPR.**

|             | <u><b>EDIII-DV1</b></u>                       |                                                | <u><b>EDIII-DV2</b></u>                       |                                                | <u><b>EDIII-DV3</b></u>                       |                                                | <u><b>EDIII-DV4</b></u>                       |                                                |
|-------------|-----------------------------------------------|------------------------------------------------|-----------------------------------------------|------------------------------------------------|-----------------------------------------------|------------------------------------------------|-----------------------------------------------|------------------------------------------------|
|             | <b><math>k_{\text{on}}</math><sup>a</sup></b> | <b><math>k_{\text{off}}</math><sup>b</sup></b> | <b><math>k_{\text{on}}</math><sup>a</sup></b> | <b><math>k_{\text{off}}</math><sup>b</sup></b> | <b><math>k_{\text{on}}</math><sup>a</sup></b> | <b><math>k_{\text{off}}</math><sup>b</sup></b> | <b><math>k_{\text{on}}</math><sup>a</sup></b> | <b><math>k_{\text{off}}</math><sup>b</sup></b> |
| <b>4E11</b> | 1.11                                          | 5.51                                           | 1.98                                          | 123                                            | 1.34                                          | 102                                            | N.B. <sup>c</sup>                             | N.B. <sup>c</sup>                              |
| <b>4E5A</b> | 1.17                                          | 20.8                                           | 2.01                                          | 14.1                                           | 2.76                                          | 143                                            | 0.766                                         | 875                                            |

<sup>a</sup> $k_{\text{on}}$  values are expressed as ( $\times 10^6 \text{ M}^{-1} \text{ s}^{-1}$ )

<sup>b</sup> $k_{\text{off}}$  values are expressed as ( $\times 10^{-4} \text{ s}^{-1}$ )

<sup>c</sup>N.B., no binding

**Table S11. Comparison of results of various *in silico* antibody affinity enhancement studies.**

| <b>Study</b>                                     | <b>Method</b>         | <b>Antibody</b> | <b>Antigen</b>  | <b>Crystal structure ?</b> | <b>Single /multiple antigen(s)</b> | <b>Affinity improvement (fold change)</b> |
|--------------------------------------------------|-----------------------|-----------------|-----------------|----------------------------|------------------------------------|-------------------------------------------|
| Our study                                        | Empirical informatics | 4E11            | DV E protein    | No                         | Multiple (4)                       | ~450                                      |
| Lippow SM et. al., Nature Biotech (2007) (1)     | Energetics            | D44.1           | lysozyme        | Yes                        | Single                             | 140, 10                                   |
| Marvin J.S. et. al., Biochemistry (2003)(2)      | Energetics            | Y0101           | VEGF            | Yes                        | Single                             | ~6                                        |
| Clark LA et.al., Protein Science (2006)(3)       | Energetics            | AQC2            | VLA1            | Yes                        | Single (2)                         | ~10                                       |
| Farady et al. (2009) Bioorg. Med. Chem. Lett.(4) | Energetics            | E2              | Protease MT-SP1 | Yes                        | Multiple                           | 14                                        |

**Table S12. Antibody mutations predicted with ‘Calculate Mutation Energy (Binding)’ protocol available on Discovery Studio.**  
Mutations that increased the affinity of 4E11 are highlighted in yellow.

| Mutation at ALA55 | Mutation Energy | Effect of Mutation | Mutation at ARG31 | Mutation Energy | Effect of Mutation | Mutation at ASN57 | Mutation Energy | Effect of Mutation | Mutation at GLU59 | Mutation Energy | Effect of Mutation | Mutation at SER60 | Mutation Energy | Effect of Mutation |
|-------------------|-----------------|--------------------|-------------------|-----------------|--------------------|-------------------|-----------------|--------------------|-------------------|-----------------|--------------------|-------------------|-----------------|--------------------|
| VH:ALA55          |                 |                    | VL:ARG31          |                 |                    | VL:ASN57          |                 |                    | VL:GLU59          |                 |                    | VL:SER60          |                 |                    |
| GLU               | -1              | stabilizing        | LYS               | -1.01           | stabilizing        | LEU               | -1.79           | stabilizing        | PHE               | -1.02           | stabilizing        | SER               | -2.21           | stabilizing        |
| THR               | -0.44           | neutral            | HIS               | -0.13           | neutral            | PHE               | -1.69           | stabilizing        | TYR               | -1              | stabilizing        | PHE               | -2.17           | stabilizing        |
| TRP               | -0.4            | neutral            | MET               | -0.04           | neutral            | TYR               | -1.44           | stabilizing        | GLN               | -0.86           | stabilizing        | ARG               | -1.69           | stabilizing        |
| ASP               | -0.37           | neutral            | PRO               | -0.04           | neutral            | ARG               | -0.88           | stabilizing        | ARG               | -0.5            | neutral            | LYS               | -1.69           | stabilizing        |
| GLN               | -0.33           | neutral            | ARG               | 0               | neutral            | TRP               | -0.64           | stabilizing        | LYS               | -0.35           | neutral            | GLN               | -1.65           | stabilizing        |
| LEU               | -0.33           | neutral            | ILE               | 0.16            | neutral            | GLN               | -0.62           | stabilizing        | ASP               | -0.29           | neutral            | LEU               | -1.44           | stabilizing        |
| TYR               | -0.29           | neutral            | THR               | 0.22            | neutral            | MET               | -0.57           | stabilizing        | MET               | -0.24           | neutral            | TRP               | -1.31           | stabilizing        |
| ARG               | -0.23           | neutral            | VAL               | 0.22            | neutral            | HIS               | -0.51           | stabilizing        | HIS               | -0.23           | neutral            | MET               | -1.26           | stabilizing        |
| PRO               | -0.23           | neutral            | ASN               | 0.24            | neutral            | LYS               | -0.04           | neutral            | LEU               | -0.1            | neutral            | HIS               | -0.8            | stabilizing        |
| ILE               | -0.17           | neutral            | ALA               | 0.3             | neutral            | ASN               | 0               | neutral            | ILE               | -0.01           | neutral            | ASN               | -0.79           | stabilizing        |
| MET               | -0.17           | neutral            | CYS               | 0.32            | neutral            | ILE               | 0.53            | destabilizing      | GLU               | 0               | neutral            | CYS               | -0.64           | stabilizing        |
| VAL               | -0.14           | neutral            | SER               | 0.34            | neutral            | ASP               | 0.58            | destabilizing      | PRO               | 0.05            | neutral            | THR               | -0.57           | stabilizing        |
| PHE               | -0.09           | neutral            | GLY               | 0.41            | neutral            | PRO               | 0.68            | destabilizing      | VAL               | 0.06            | neutral            | ALA               | -0.56           | stabilizing        |
| CYS               | -0.04           | neutral            | TYR               | 0.46            | neutral            | THR               | 0.93            | destabilizing      | THR               | 0.17            | neutral            | ASP               | -0.45           | neutral            |
| ALA               | 0               | neutral            | PHE               | 0.47            | neutral            | CYS               | 1.14            | destabilizing      | SER               | 0.34            | neutral            | GLU               | -0.42           | neutral            |
| HIS               | 0.06            | neutral            | GLN               | 0.48            | neutral            | GLU               | 1.17            | destabilizing      | CYS               | 0.39            | neutral            | GLY               | -0.05           | neutral            |
| GLY               | 0.07            | neutral            | LEU               | 0.48            | neutral            | ALA               | 1.32            | destabilizing      | ALA               | 0.51            | destabilizing      | TYR               | 0               | neutral            |
| ASN               | 0.13            | neutral            | TRP               | 0.68            | destabilizing      | SER               | 1.53            | destabilizing      | GLY               | 0.52            | destabilizing      | ILE               | 0.43            | neutral            |
| SER               | 0.17            | neutral            | ASP               | 1.14            | destabilizing      | VAL               | 1.88            | destabilizing      | ASN               | 0.68            | destabilizing      | VAL               | 0.61            | destabilizing      |
| LYS               | 1.06            | destabilizing      | GLU               | 1.26            | destabilizing      | GLY               | 1.95            | destabilizing      | TRP               | 2.53            | destabilizing      | PRO               | 3.31            | destabilizing      |

## SI TEXT

### SI Text1: Multivariate logistic regression: model fitting and diagnostics

#### *Part I: Variable Transformation and Model Selection*

First, we assess collinear features and those with missing values. We removed disulfide bridges due to missing value (none of the examined interfaces contains S-S bridge). Further, we removed aromatic-aromatic, aromatic-sulfur, hydrogen bonds (main chain-main chain, side chain-side chain, main chain-side chain), number of salt bridge interactions and number of hydrogen bonds that involve charged residues. The remaining features were standardized within each PDB with respect to the minimum value:

$$X'_i = \frac{(X_i - \min(X_i))}{\max(X_i) - \min(X_i)}$$

Next we used stepwise selection method to search for proper models with minimum Akaike Information Criterion (AIC) criteria. Then, statistically insignificant features were removed. The selected model contains ZEPH (odds ratio = 4.94; p-value=2E-16), buried surface area (odds ratio = 0.59; p-value= 9.94E-04), density of hydrogen bonds (odds ratio = 0.40; p-value = 4.32E-07) and cation-pi interactions (odds ratio = 1.45; p-value = 8.31E-04) as the significant features.

#### *Part II: Model Diagnostic*

We checked the model with respect to the following aspects:

##### (a) Model adequacy:

We applied Chi-square test to check the adequacy of the model. The result shows that each of the features makes significant contribution to the model. If any one of the features is removed, the trimmed model is less predictive than the parent model.

##### (b) Goodness-of-Fit

The result of Hosmer and Lemeshow Goodness-of-Fit Test shows no evidence implying lack of fit. For all the ten equal-size subgroup, the expected number is very close to the observed number. The overall p-value of Chi-square test is 0.997.

##### (c) Independent variables collinearity;

We checked the collinearity diagnostic and found that all the condition indices are smaller than the benchmark (<10), indicating that there is no collinearity among the significant features.

##### (d) Model residuals performance.

For the fitted model, we calculated the Pearson residuals and deviation residuals and computed DFBETAS, DIFCHISQ, DIFDEV, RESCHI and RESDEV. For the cases where natural poses exist, a few of the fitted above indices are high ( $\approx 13$  cases out of 40). However, the above diagnostics indicate that the model is generally good.

|         | Model adequacy | Hosmer and Lemeshow Goodness-of-Fit | Independent variables collinearity | Model residuals performance |
|---------|----------------|-------------------------------------|------------------------------------|-----------------------------|
| RMSD=3  | Y              | 0.347                               | Y                                  | 21/40                       |
| RMSD=5  | Y              | 0.594                               | Y                                  | 13/40                       |
| RMSD=10 | Y              | 0.763                               | Y                                  | 9/40                        |

Note:

(1): “Y” indicates lack of collinearity.

(2): “Hosmer and Lemeshow Goodness-of-Fit” p-value

(3): “Model residuals performance” shows how many fitted point influence the model.

#### SI Text2: Homology modeling of 4E11 Fv

A structural model of 4E11 Fv was built using SIWW-MODEL homology modeling server (5). The solved crystal structure of 1A1D-2 (PDB: 2R29) (6), which has 86% and 85% sequence identities to 4E11 in VH and VL, was used as a template. The L2, L3, H1 and H2 CDR loops belong to canonical classes 1, 1, 1 and 2, respectively (7). L1 does not belong to any known canonical class. The length of CDR H3 loop is 7. No additional refinements were carried out.

#### SI Text3: Computational docking for generating 4E11-EDIII (DV 1-4) structures

The homology modeled 4E11 Fv was docked against EDIII of a select DV1 strain using ZDOCK. The choice to use DV1 antigen was influenced by the fact that mAb 4E11 was originally isolated from a mouse infected with a serotype 1 virus (8). The structure of the DV1 antigen was modeled using SWISS MODEL homology modeling server keeping the solved crystal structure of DV1 EDIII (PDB: 3IRC) as the template. ZDOCK uses shape complementarity along with desolvation and electrostatic energy terms (‘ZRANK’) to rank the docked poses (9). In order to ensure the docked poses do not deviate significantly from the native complex, mapped epitope and paratope residues found in the literature were forced to be included in the binding interface. Residues included in the interface were 307K, 389L and 391W (epitope; DV1 numbering as in 3IRC) and 101W, 102E (paratope; numbering based on sequence position).

The structures of 4E11 in complex with DV 2, 3, 4 (EDIII) were modeled using 4E11-DV1 EDIII structural model as the template. Backbone conformational changes upon antigen-antibody association are difficult to model computationally and were not attempted.

#### SI Text4: Cells & viruses

Vero (African green monkey kidney) and C6/36 (*Aedes albopictus*) cells were purchased from ATCC. Vero cells were cultured with DMEM/F-12 (50:50) medium (Invitrogen) supplemented with 10% FBS (Invitrogen) in a 37°C humidified 5% CO<sub>2</sub> incubator. C6/36 cells

were maintained in EMEM (ATCC) supplemented with 10% FBS in a 28°C humidified 5% CO<sub>2</sub> incubator. Suspension Freestyle 293 cells (Invitrogen) were cultured in Freestyle 293 medium (Invitrogen). Dengue viruses TH-S-man (serotype 1), NGC (serotype 2), and H87 (serotype 3), and BC287/97 (serotype 4) were purchased from ATCC or BEI Resources. Viruses were propagated by infection of C6/36 cells (MOI ~0.1) and harvested after 5-8 days. Aliquots were stored at -80°C.

#### **SI Text5: Focus forming assay**

Viruses were titered by focus forming assay with Vero cells and expressed as focus-forming units (FFU) per ml. Serial dilutions of virus were incubated for 2 hours with 95% confluent Vero cells in 24-well plates at 37°C, after which one ml of viscous overlay (DMEM/F12 containing 1% Aquacide II [EMD Millipore]) was added to the monolayer. After 4-6 day incubation period at 37°C, the overlay was removed, cells were fixed with formalin, and foci were revealed by sequential incubation with pan-flavivirus 4G2 mouse antibody, HRP-conjugated goat anti-mouse IgG antibody (Santa Cruz Biotechnology), and TrueBlue Peroxidase Substrate (KPL).

#### **SI Text6: Expression and purification of antibodies and EDIII proteins**

4E11 antibody was generated by DNA synthesis of 4E11 VH and VL regions (GenBank accession numbers AJ131288.1 and AJ131289.1, respectively) and cloned using standard techniques into pcDNA 3.3 plasmid (Invitrogen) containing the constant region of either human IgG1 heavy chain or human kappa light chain. Mutant mAbs were generated by either site-directed mutagenesis (Agilent) or variable region DNA synthesis. Antibodies were expressed in Freestyle 293 cells by transient transfection with polyethylenimine (PEI) and purified by protein A chromatography. EDIII DNA sequences (corresponding to E protein amino acid residues 293-400) of strains TH-S-man, NGC, H87, and BC298/97, representing serotypes 1-4, respectively, were synthesized with C-terminal 6X-His tags and cloned into pJExpress414 plasmids. The proteins were expressed in Origami2(DE3) *E. coli* (EMD Millipore), essentially as described(10). EDIII was purified by IMAC using His-Trap columns (GE Healthcare) and stored at 4°C or -20°C for long-term storage.

#### **SUPPLEMENTARY REFERENCES**

1. Lippow SM, Wittrup KD, & Tidor B (2007) Computational design of antibody-affinity improvement beyond in vivo maturation. (Translated from eng) *Nat Biotechnol* 25(10):1171-1176 (in eng).
2. Marvin JS & Lowman HB (2003) Redesigning an antibody fragment for faster association with its antigen. *Biochemistry* 42(23):7077-7083.
3. Clark LA, *et al.* (2006) Affinity enhancement of an in vivo matured therapeutic antibody using structure-based computational design. *Protein science : a publication of the Protein Society* 15(5):949-960.

4. Farady CJ, Sellers BD, Jacobson MP, & Craik CS (2009) Improving the species cross-reactivity of an antibody using computational design. *Bioorganic & medicinal chemistry letters* 19(14):3744-3747.
5. Schwede T, Kopp J, Guex N, & Peitsch MC (2003) SWISS-MODEL: An automated protein homology-modeling server. *Nucleic acids research* 31(13):3381-3385.
6. Lok SM, *et al.* (2008) Binding of a neutralizing antibody to dengue virus alters the arrangement of surface glycoproteins. *Nature structural & molecular biology* 15(3):312-317.
7. Chothia C, *et al.* (1989) Conformations of immunoglobulin hypervariable regions. *Nature* 342(6252):877-883.
8. Thullier P, *et al.* (1999) A recombinant Fab neutralizes dengue virus in vitro. *Journal of biotechnology* 69(2-3):183-190.
9. Pierce B & Weng Z (2007) ZRANK: reranking protein docking predictions with an optimized energy function. *Proteins* 67(4):1078-1086.
10. Saejung W, *et al.* (2006) Enhancement of recombinant soluble dengue virus 2 envelope domain III protein production in *Escherichia coli* trxB and gor double mutant. *Journal of Bioscience and Bioengineering* 102(4):333-339.
